# Supplementary material for: Facile synthesis of wavy carbon nanowires via activation-enabled reconstruction and their applications towards nanoparticles separation and catalysis
Source: Royal Society of Chemistry journal article supplement (doi:10.1039/c8ra02639d), 2018-01-01
Supplement: c8ra02639d1.pdf [file c8ra02639d1.pdf]

Supporting information for

## Facile synthesis of wavy carbon nanowires via activation-enabled reconstruction and their applications towards nanoparticles separation and catalysis

Fengting Li,<sup>a</sup> Chenxue Yao,<sup>b</sup> Yiqun Zheng,<sup>b,\*</sup> Shifeng Hou<sup>b</sup>,

<sup>a</sup> School of Chemistry and Chemical Engineering, Shandong University, Jinan, Shandong 250100, P. R. China

<sup>b</sup> National Engineering Research Center for Colloidal Materials, Shandong University, Jinan, Shandong 250100, P. R. China

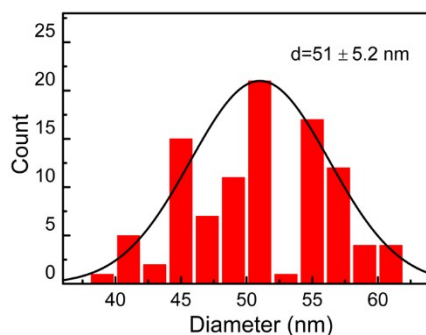

---

\* Corresponding author: Prof. Yiqun Zheng, Tel.: +86-531-88363180 E-mail: yiqunzheng@sdu.edu.cn;

Prof. Shifeng Hou, Tel.: +86-531-88362815 E-mail: shifenghou@sdu.edu.cn

**Fig. S1** Size distribution histogram of WCNWs.

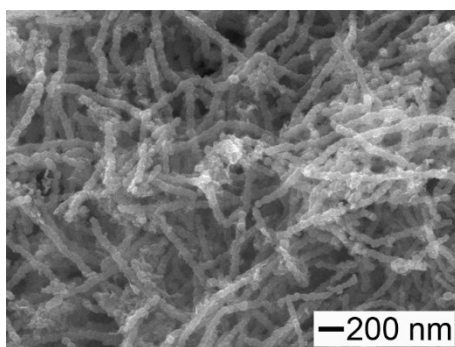

**Fig. S2** SEM image of WCNWs after calcination under Ar/H<sub>2</sub> (95/5) flow at 1000 °C for 1 h.

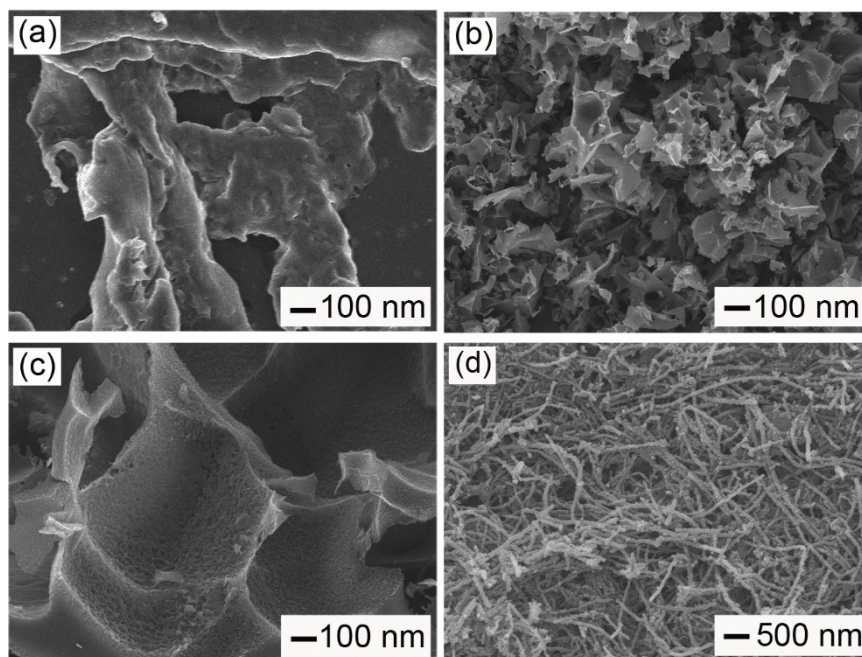

**Fig. S3** Effect of KOH amount on the morphology and structure of the resultant products. SEM images of products obtained via the standard procedure, except that the mass ratio of PU: KOH was set to (a) 1:0, (b) 1:1, (c) 1:3, and (d) 1:5, respectively.

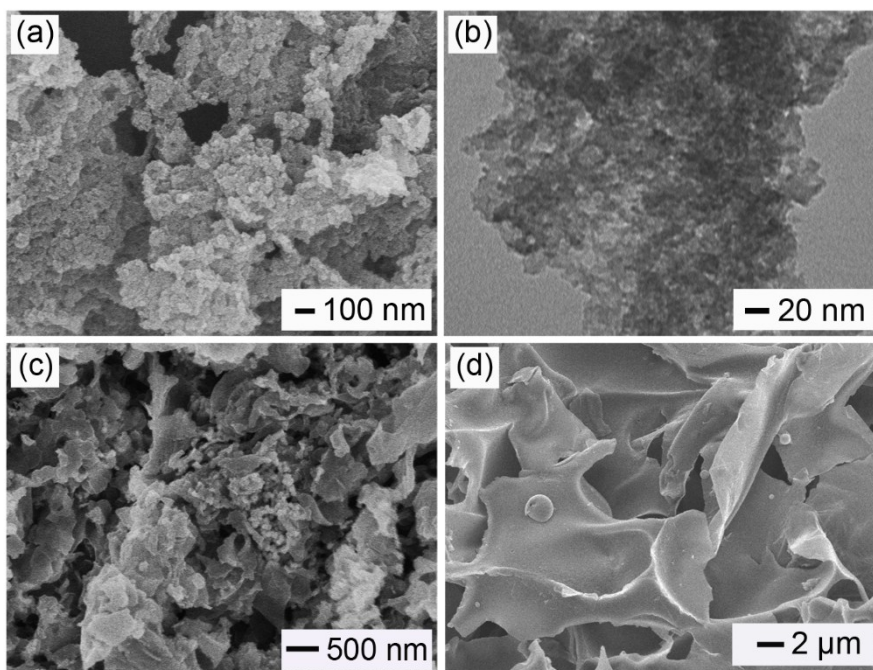

**Fig. S4** (a, c, d) SEM and (b) TEM image of precursors obtained at the pre-activation temperature of (a, b) 400 °C, (c) 300 °C, and (d) 500 °C, respectively. These precursors were obtained via only the pre-activation stage, which is the thermal treatment of PU/KOH mixture (mass ratio: 1:4) at a certain pre-activation temperature for 1 h under argon protection.

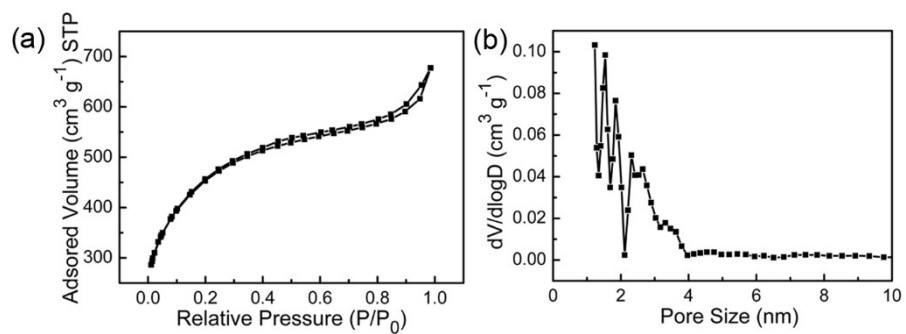

**Fig. S5** (a) N<sub>2</sub> adsorption/desorption isotherms and (b) pore size distribution curves of the precursor obtained at the pre-activation temperature of 400 °C.

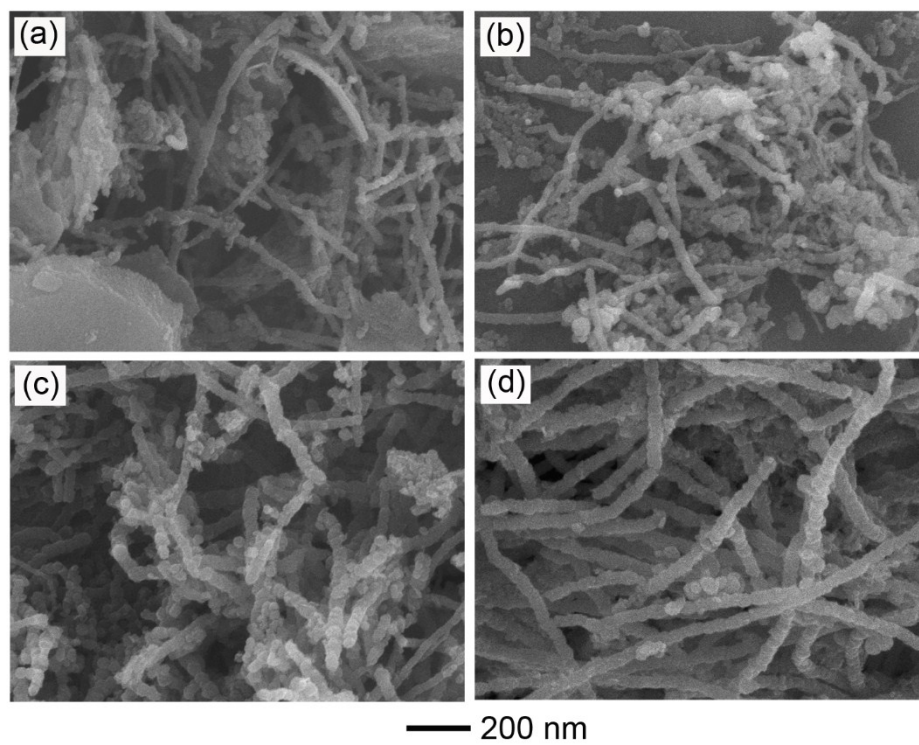

**Fig. S6** SEM images of products obtained via standard process except that activation time was set to (a) 1 min, (b) 10 min, (c) 30 min and (d) 40 min.

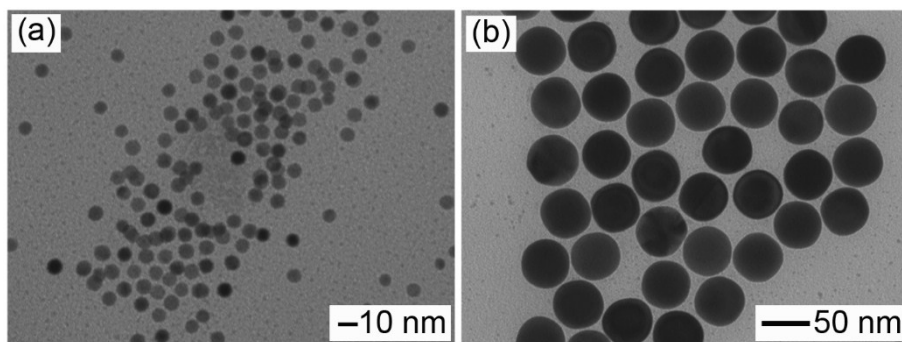

**Fig. S7** TEM images of Au nanospheres with the average size of (a) 10 nm and (b) 50 nm.



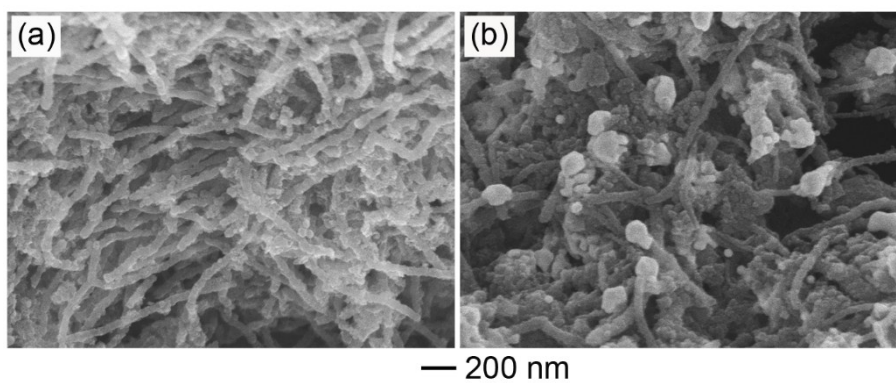

**Fig. S8** SEM images of WCNWs membrane (a) before and (b) after filtering the Au nanospheres suspension.

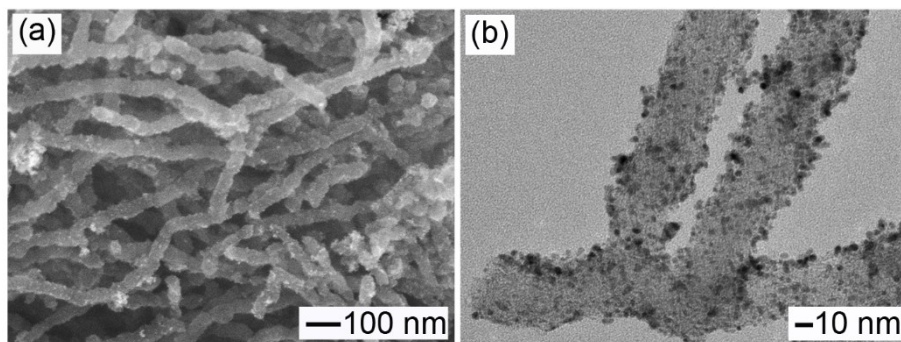

**Fig. S9** (a) SEM and (b) TEM image of Pd/WCNWs catalyst.

**Table S1.** The chemical composition of WCNWs characterized by XPS and elemental analyzer, respectively, before and after calcination under Ar/H<sub>2</sub> (95/5) flow at 1000 °C.

| Element | XPS                |                   | Elemental Analyzer |                   |
|---------|--------------------|-------------------|--------------------|-------------------|
|         | Before calcination | After calcination | Before calcination | After calcination |
|         | (%)                | (%)               | (%)                | (%)               |
| C       | 94.43              | 96.53             | 89.75              | 89.99             |
| O       | 5.57               | 3.47              | 9.151              | 9.415             |
| N       | --                 | --                | 0.12               | 0.13              |
| H       | --                 | --                | 0.979              | 0.465             |
| S       | --                 | --                | --                 | --                |
